# Supplementary material
Source: PubMed Central journal article supplement (PMC2783429)
Supplement: NIHMS153612-supplement-01.pdf [file NIHMS153612-supplement-01.pdf]

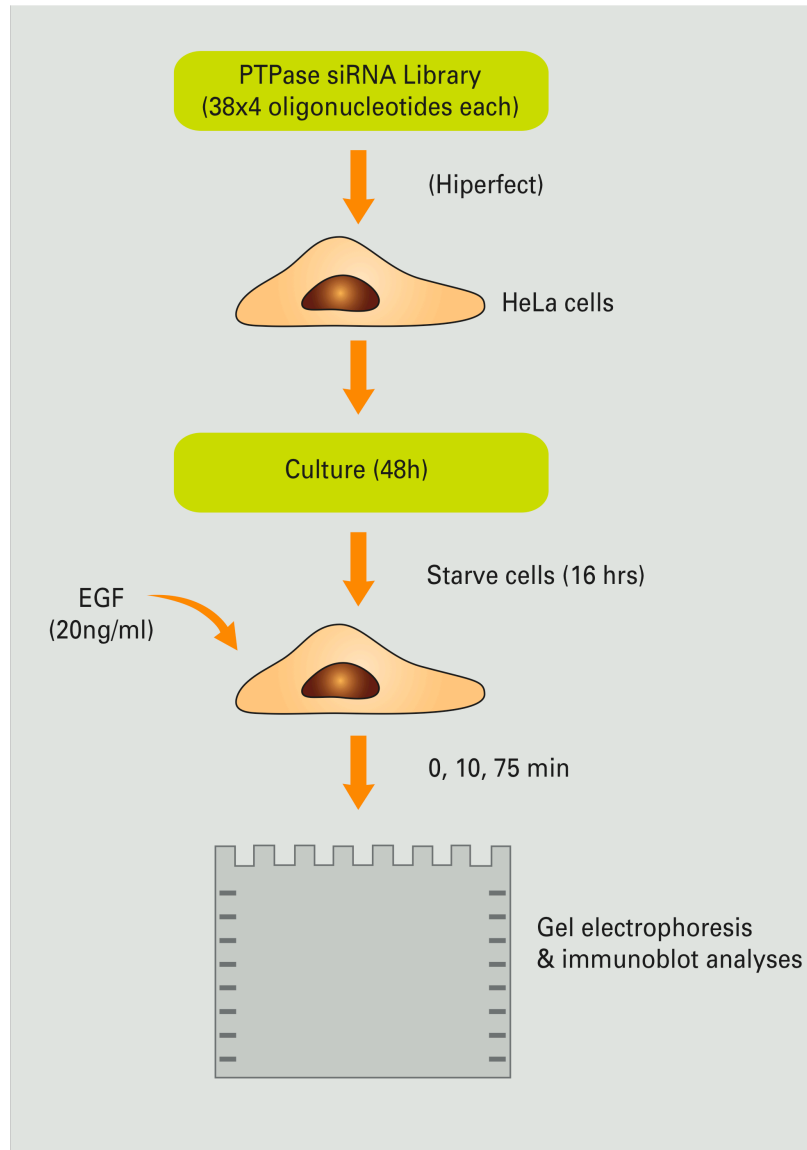

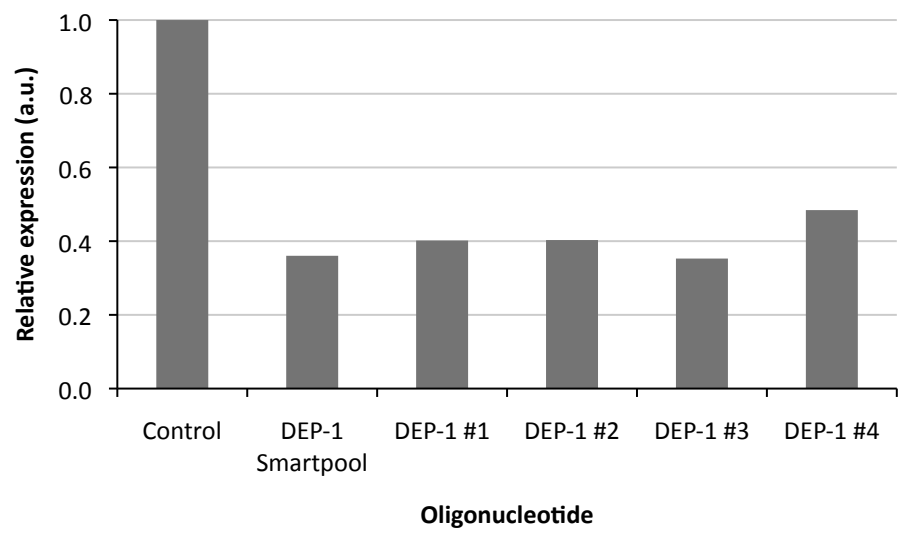

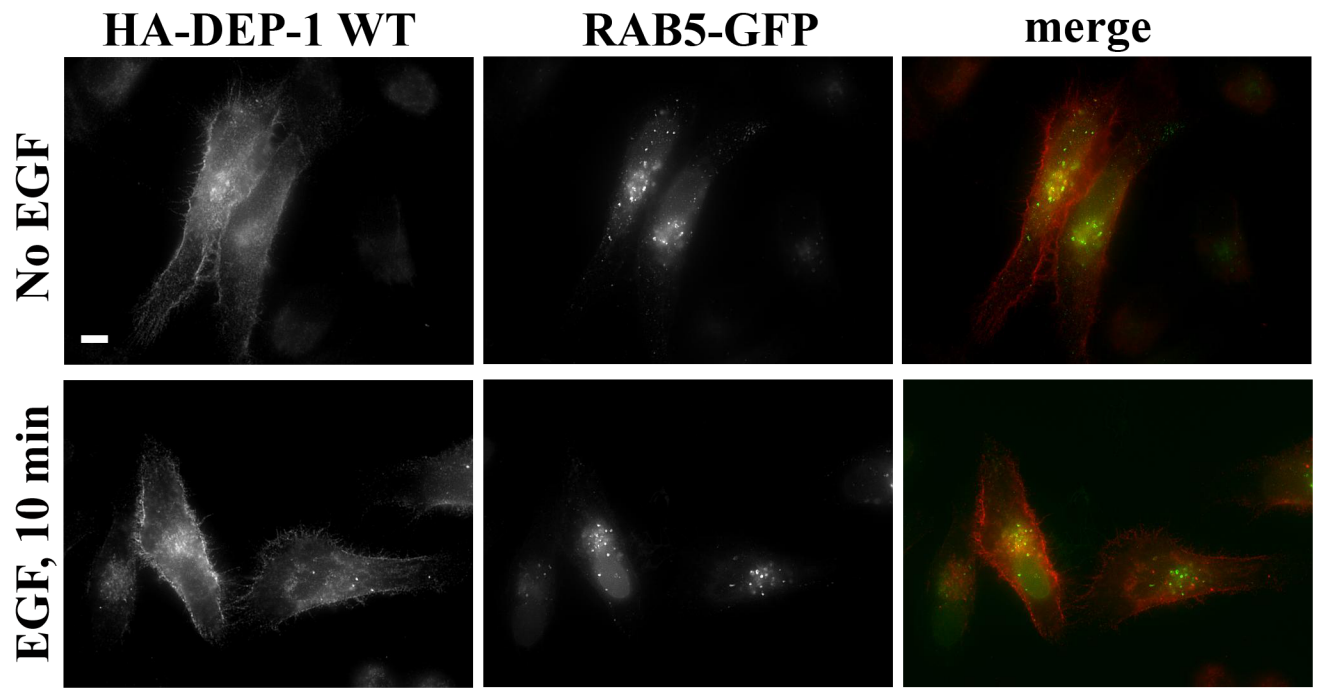

Supplementary Table S1: PTP siRNA screen summary

| Gene Symbol | mRNA expression | Results after blind screen  | Validation |
|-------------|-----------------|-----------------------------|------------|
| DUSP2       | Yes             | Effect on ERK1/2 activation | √          |
| DUSP6       | Yes             | Effect on ERK1/2 activation | √          |
| PTP4A1      | Yes             | No effect                   |            |
| PTP4A2      | Yes             | No effect                   |            |
| PTP4A3      | Yes             | No effect                   |            |
| PTPDC1      | n/a             | No effect                   |            |
| PTPN1       | Yes             | No effect                   |            |
| PTPN11      | Yes             | No effect                   |            |
| PTPN12      | Yes             | No effect                   |            |
| PTPN13      | Yes             | Effect on ERK1/2 activation | X          |
| PTPN14      | Yes             | No effect                   |            |
| PTPN18      | Yes             | No effect                   |            |
| PTPN2       | Yes             | No effect                   |            |
| PTPN21      | No              | Effect on EGFR levels       | X          |
| PTPN22      | No              | Effect on EGFR levels       | X          |
| PTPN23      | n/a             | No effect                   |            |
| PTPN3       | Yes             | No effect                   |            |
| PTPN4       | No              | No effect                   |            |
| PTPN5       | n/a             | No effect                   |            |
| PTPN6       | No              | No effect                   |            |
| PTPN7       | No              | No effect                   |            |
| PTPN9       | Yes             | No effect                   |            |
| PTPRA       | Yes             | Effect on ERK1/2 activation | X          |
| PTPRB       | No              | No effect                   |            |
| PTPRC       | No              | Effect on EGFR levels       | X          |
| PTPRD       | No              | No effect                   |            |
| PTPRE       | Yes             | No effect                   |            |
| PTPRF       | Yes             | No effect                   |            |
| PTPRG       | No              | No effect                   |            |
| PTPRH       | No              | Effect on EGFR levels       | X          |
| PTPRJ       | Yes             | Effect on EGFR levels       | √          |
| PTPRK       | Yes             | Effect on EGFR levels       | √          |
| PTPRM       | Yes             | Effect on EGFR levels       | X          |
| PTPRN       | No              | No effect                   |            |
| PTPRO       | No              | Effect on EGFR activation   | X          |
| PTPRR       | Yes             | No effect                   |            |
| PTPRS       | No              | Effect on EGFR activation   | X          |
| PTPRT       | No              | No effect                   |            |
| PTPRU       | No              | No effect                   |            |
| PTPRZ1      | No              | No effect                   |            |

mRNA expression levels as measured using the U133a affymetrix microarray and HeLa cells. No expression means undetectable signals using the probe-sets in the array, n/a means there were no probesets annotated. Screening was repeated twice. The results present either of the two rounds of screening.

Supplementary Table S2: siDEP-1 oligonucleotide sequence information

|    | Sequence <sup>1</sup> | Position in DEP-1 mRNA | Sequence homology to other PTPs <sup>2</sup> |
|----|-----------------------|------------------------|----------------------------------------------|
| #1 | CAUCAACCAUGGUGUAACA   | 854-872                | Non detected                                 |
| #2 | AGUCCUGCUUGUCGGGUUA   | 1342-1360              | Non detected                                 |
| #3 | GAUACAAUGCCACCGUUUA   | 1374-1392              | Non detected                                 |
| #4 | GUGGUCAGCACGACGGAGA   | 1745-1763              | Non detected                                 |

<sup>1</sup> Oligonucleotide sequences provided by vendor.

<sup>2</sup> Sequence homology was found using the nucleotide BLAST suite (<http://blast.ncbi.nlm.nih.gov/Blast.cgi>) with the human genomic plus transcript (human G+T) database.
